# Supplementary material for: Lipidomics and untargeted metabolomics analysis in elderly disabled patients
Source: Research Square preprint supplement (doi:10.21203/rs.3.rs-7058784/v1), 2025-07-15
Supplement: Supplementary file 1 [file b6f5aca5cc548c422d703b34.docx]

**Fig. S1** Differential lipid molecule K-mean plots between serum samples from elderly disabled

patients and elderly healthy controls. The X-axis is the serum sample group, and the Y-axis is the normalized relative expression of metabolites.

**Fig. S2** K-mean plot of differential metabolites between groups in serum samples from elderly

disabled patients and elderly healthy controls. The X-axis is the serum sample group, and the Y-axis is the normalized relative expression of metabolites.

**Fig. S3** Differential metabolite HMDB enrichment in serum samples from elderly disabled

patients and elderly healthy controls.
